# Supplementary material
Source: PubMed Central journal article supplement (PMC5941178)
Supplement: rstb20170183supp1.pdf [file rstb20170183supp1.pdf]

## Supplemental Table S1: Amino acid replacements causing defects in allosteric control in Hsp70s

Activities and conformational changes of amino acid replacement variants relative to the wild type protein.

| Position in DnaK | replacement | protein analyzed <sup>b</sup> | Crystal structure contacts <sup>a</sup>                 |                                                         | ATPase rel. $k_{cat}$ <sup>c</sup> | Effects on allostery                     |                                     |                                         |                                               |                                                | Reference                             |     |
|------------------|-------------|-------------------------------|---------------------------------------------------------|---------------------------------------------------------|------------------------------------|------------------------------------------|-------------------------------------|-----------------------------------------|-----------------------------------------------|------------------------------------------------|---------------------------------------|-----|
|                  |             |                               | 1HPM                                                    | 4B9Q                                                    |                                    | Substrate stimulated ATPase <sup>d</sup> | DnaJ-stimulated ATPase <sup>e</sup> | DnaJ-Substrate stimulation <sup>f</sup> | ATP-stimulated substrate release <sup>g</sup> | ATP-induced conformational change <sup>h</sup> |                                       |     |
| 11               | T37G        | CgBiP                         | T13/OG1-Pi/O4                                           | T13/OG1-ATP/O1G                                         | 0.19                               | -                                        |                                     |                                         |                                               | -                                              | - (proteolysis)                       | (1) |
|                  | T13G        | BtHsc70                       | T13/ N-Pi/O3                                            |                                                         | 0.002                              |                                          |                                     |                                         |                                               |                                                | no $\Delta$ Rg (SAXS)<br>no blueshift | (2) |
|                  | T13S        | BtHsc70                       |                                                         |                                                         | 0.09                               |                                          |                                     |                                         |                                               |                                                | red. $\Delta$ Rg (SAXS)               | (2) |
|                  | T13V        | BtHsc70                       |                                                         |                                                         | 0.02                               |                                          |                                     |                                         |                                               |                                                | no $\Delta$ Rg (SAXS)<br>no blueshift | (2) |
| 70               | K71M        | BtHsc70                       | K71/NZ-E175/OE2<br>K71/NZ-Pi/O3                         | K70/NZ-ATP/O1G<br>K70/NZ-E171/OE2                       | 0.00                               |                                          |                                     |                                         |                                               |                                                | no $\Delta$ Rg (SAXS)                 | (3) |
|                  | K70A        | EcDnaK                        | K71/CE-P147/CG<br>K71/CE-P147/CD                        | K70/CE-P143/CG<br>K70/CE-P143/CD                        | 0.04                               |                                          |                                     |                                         |                                               | -                                              | no blueshift                          | (4) |
| 143              | P143S       | EcDnaK                        | P147/CG-K71/CE<br>P147/CD-K71/CE                        | P143/CG-K70/CE<br>P143/CD-K70/CE                        | 0.06                               | +                                        | +                                   |                                         |                                               |                                                |                                       | (5) |
|                  | P143A       | EcDnaK                        | P147/CG-F150/CE1<br>P147/CD-F150/CE2                    | P143/CG-F146/CE1<br>P143/CD-F146/CE2                    | 0.27                               | 1.43                                     | 0.66                                | 0.46                                    | 0.16                                          |                                                | red. blueshift                        | (6) |
|                  | P143G       | EcDnaK                        |                                                         |                                                         | 0.12                               | 0.49                                     | 0.39                                | 0.24                                    | 0.67                                          |                                                | red. blueshift                        | (6) |
| 145,147,148      | YND>AAA     | EcDnaK                        |                                                         |                                                         | 3.49                               | 0.92                                     | 0.15                                | 0.125                                   | 0.34                                          |                                                | red. blueshift                        | (7) |
| 145              | Y145A       | EcDnaK                        | Y149/OH-H2O-D206/OD2                                    |                                                         | 16.10                              | 0.85                                     | 0.30                                | 0.03                                    | 0.27                                          |                                                | red. blueshift                        | (8) |
|                  | Y145F       | EcDnaK                        | Y149/OH-H2O-PiO1                                        |                                                         | 2.20                               | 1.27                                     | 2.88                                | 0.60                                    | 0.61                                          |                                                | wt blueshift                          | (8) |
|                  | Y145H       | EcDnaK                        |                                                         |                                                         | 2.40                               | 3.13                                     | 7.34                                | 1.00                                    | 0.58                                          |                                                | wt blueshift                          | (8) |
| 146              | F146A       | EcDnaK                        | F150/CZ-K70/CG<br>F150/CE1-P143/CG<br>F150/CE2-P143/CD  | F146/CZ-K70/CG<br>F146/CE1-P143/CG<br>F146/CE2-P143/CD  | 5.17                               | 0.66                                     | 1.33                                | 0.34                                    | 0.06                                          |                                                | red. blueshift                        | (8) |
| 148              | D148A       | EcDnaK                        |                                                         | D148/OD1-L484/N                                         | 3.41                               | 0.55                                     | 1.05                                | 0.07                                    | 2.4                                           |                                                | wt blueshift                          | (8) |
| 151              | R151A       | EcDnaK                        | R155/NH1-N170/OD1<br>R155/NH2-F146/O<br>R155/NH2-A144/O | R151/NH1-N170/OD1<br>R151/NH2-F146/O<br>R151/NH2-A144/O | 4.5                                | 0.12                                     | 0.37                                | 0.03                                    | 0                                             |                                                | no blueshift                          | (6) |
|                  | R151K       | EcDnaK                        | R155/NE-F146/O                                          | R151/NE-D481/O                                          | 17.6                               | 0.26                                     | 0.29                                | 0.02                                    | 0.06                                          |                                                | red. blueshift                        | (6) |
| 155              | K155A       | EcDnaK                        |                                                         |                                                         | 0.86                               | 0.82                                     | 1.79                                | 0.16                                    | 0.03                                          |                                                | red. blueshift                        | (9) |
|                  | K155D       | EcDnaK                        |                                                         |                                                         | 1.44                               | 1.46                                     | 0.73                                | 0.11                                    | 0.00                                          |                                                | red. blueshift                        | (9) |

|         |           |         |                                                                      |                                                                      |       |         |         |         |         |                    |         |
|---------|-----------|---------|----------------------------------------------------------------------|----------------------------------------------------------------------|-------|---------|---------|---------|---------|--------------------|---------|
| 167     | R167A     | EcDnaK  |                                                                      | R167/NE-D481/OD1                                                     | 2.8   | 1.04    | 0.56    | 0.11    | 0.03    | red. blueshift     | (9,10)  |
|         | R167D     | EcDnaK  |                                                                      |                                                                      | 7.3   | 0.42    | 0.51    | 0.03    | 0       | no blueshift       | (9)     |
|         | R167H     | EcDnaK  |                                                                      |                                                                      |       |         |         | reduced |         |                    | (10)    |
| 170     | N170A     | EcDnaK  | N174/OD1-R155/NH1                                                    | N170/ND2-D393/OD2                                                    |       |         |         | reduced |         |                    | (10)    |
| 171     | E175S     | BtHsc70 | E175/OE1-Pi/O1                                                       | E171/OE2-K70/NZ                                                      | 0.01  |         |         |         |         | red ΔRg (SAXS)     | (3)     |
|         | E171D     | EcDnaK  | E175/OE2-K71/NZ                                                      | E171/OE2-H2O-Mg                                                      | 0.02  | 1.15    | 0.5     | 0.25    | 0.18    | red. blueshift     | (6)     |
|         | E171Q     | EcDnaK  | E175/OE2-H2O-Mg                                                      | E171/OE1-H2O-D201/OD2                                                | 0.01  | 1.83    | 0.4     | 0.18    | 0.11    | red. blueshift     | (6)     |
| 173     | T173A     | EcDnaK  |                                                                      | T173/OG1-D393/OD2<br>T173/CG2-L391/CD2                               |       |         |         | reduced |         |                    | (10)    |
| 194     | D199S     | BtHsc70 | D199/OD1-H2O-Mg<br>D199/OD2-H2O-Mg<br>D199/N-D206/O<br>D199/O-D206/N | D194/OD1-H2O-Mg<br>D194/OD2-H2O-Mg<br>D194/N-D201/O<br>D194/O-D201/N | 0.32  |         |         |         |         | no ΔRg (SAXS)      | (3)     |
| 196     | G226D     | CgBiP   |                                                                      |                                                                      | 0.33  |         |         |         | -       | - (proteolysis)    | (1)     |
| 197     | G227D     | CgBiP   | G202/N-ADP/O1B                                                       | G197/N-ATP/O3B                                                       | 0.29  |         |         |         | -       | - (proteolysis)    | (1)     |
| 199     | T199A     | EcDnaK  | T204/OG1-Pi/O4                                                       | -                                                                    | 0.030 |         |         |         | +       | wt blueshift       | (4)     |
|         | T204E     | BtHsc70 |                                                                      |                                                                      | 7.500 |         |         |         |         |                    | (11)    |
|         | T204V     | BtHsc70 |                                                                      |                                                                      | 0.350 |         |         |         |         |                    | (11)    |
|         | T229G     | CgBiP   |                                                                      |                                                                      | -     |         |         |         | +       | yes                | (1)     |
| 201     | D201N     | EcDnaK  | D206/OD2-H2O-Y149/OH                                                 | D201/OD2-H2O-E171/OE1                                                | 10.3  | 0.1-0.2 | -       |         |         | red. (proteolysis) | (12)    |
|         | D206S     | BtHsc70 | D206/OD2-H2O-Pi/O1                                                   |                                                                      | 0.28  |         |         |         |         | red ΔRg (SAXS)     | (3)     |
| 217,218 | EV>AA     | EcDnaK  |                                                                      |                                                                      | 4.29  | 0.85    | 0.11    | 0.07    | 0.10    | red. blueshift     | (7)     |
| 326     | D326V     | EcDnaK  |                                                                      | D326/OD2-K414/NZ<br>D326/OD2-N415/ND2                                | ca. 2 | 0.43    |         |         |         | red. blueshift     | (13)    |
| 388     | D388R     | EcDnaK  |                                                                      |                                                                      | 1.33  | 0.81    | 2.3     | 0.35    | 0.96    | wt blueshift       | (9)     |
| 389-392 | VLLL>AAAA | EcDnaK  |                                                                      |                                                                      |       | -       | -       | -       | -       |                    | (14,15) |
| 389-392 | VLLL>VDDL | EcDnaK  |                                                                      |                                                                      |       | -       | -       | -       | -       |                    | (14,15) |
| 389     | V389A     | EcDnaK  |                                                                      | V389/CG1-L177/CD2<br>V389/CG1-V281/CG2<br>V389/CG1-F216/CD1          |       | -       | +       | +       | reduced |                    | (16)    |
|         | V389D     | EcDnaK  |                                                                      |                                                                      |       | -       | -       | reduced | -       |                    | (16)    |
| 390     | L390A     | EcDnaK  |                                                                      |                                                                      |       | reduced | reduced | reduced |         |                    | (16)    |
|         | L390D     | EcDnaK  |                                                                      |                                                                      |       | reduced | -       | -       |         |                    | (16)    |
| 391     | L391A     | EcDnaK  |                                                                      | L391/CD1-L177/CD2<br>L391/CD1-F216/CB<br>L391/CD2-T173/CG2           |       | -       | -       | reduced | reduced |                    | (16)    |
|         | L391D     | EcDnaK  |                                                                      |                                                                      |       | -       | -       | -       | -       |                    | (16)    |

|     |       |        |                                      |         |         |      |      |         |                |  |        |
|-----|-------|--------|--------------------------------------|---------|---------|------|------|---------|----------------|--|--------|
| 392 | L392A | EcDnaK |                                      |         | reduced | -    | -    |         |                |  | (16)   |
|     | L392D | EcDnaK |                                      |         | reduced | -    | -    | reduced |                |  | (16)   |
| 393 | D393A | EcDnaK | D393/OE2-N170/ND2                    | 2.40    | 0.44    | 0.51 | 0.02 | 0.01    | no blueshift   |  | (9)    |
|     | D393R | EcDnaK | D393/OE2-T173/OG1                    | 1.36    | 0.36    | 0.51 | 0.02 | 0.00    | no blueshift   |  | (9)    |
| 414 | K414I | EcDnaK | K414/NZ-D326/OD2                     | 25.9    |         |      |      | 0.002   | no blueshift   |  | (8,17) |
| 415 | N415G | EcDnaK | N415/ND2-D326/OD2<br>N415/OD1-T221/N | ca. 1.6 | 0.5     |      |      |         | red. blueshift |  | (13)   |
| 440 | V440A | EcDnaK | V440/CG1-L484/CD2                    | 1.97    | 0.42    | 1.43 | 0.06 | 2.4     | red. blueshift |  | (8)    |
| 481 | D481A | EcDnaK | D481/OD1-I168/N<br>D481/OD1-R167/NE  | 84      | 0.56    | 0.89 | 0.03 | 0.002   | no blueshift   |  | (8)    |
|     | D481K | EcDnaK | D481/O-R151/NE                       | 70      | 0.64    | 0.57 | 0.02 | 0.001   | no blueshift   |  | (8)    |
| 484 | L484A | EcDnaK | L484/CD2-V440/CG1                    | 1.72    | 0.5     | 0.98 | 0.06 | 2.9     | red. blueshift |  | (8)    |

a: Crystal structure contacts in the ADP·Pi bound NBD (1HPM, DnaK numbering) and the ATP bound DnaK (4B9Q) in pdb nomenclature. Distances between H-bond donor and acceptor <3.5 Å; hydrophobic contacts <4.2 Å; b: Cg, *Cricetulus griseus*; Bt, *Bos taurus*; Ec, *Escherichia coli*; c:  $V_{max}(mut)/V_{max}(wt)$  or  $k_{cat}(mut)/k_{cat}(wt)$ ; d: Substrate-stimulated ATPase rate; -, not detectable; +, proficient; numbers=  $[k_{cat}(mut+substrate)/k_{cat}(mut)]/[k_{cat}(wt+substrate)/k_{cat}(wt)]$ ; e: DnaJ-stimulated ATPase rate; -, not detectable; +, proficient; numbers=  $[k_{cat}(mut+DnaJ)/k_{cat}(mut)]/[k_{cat}(wt+DnaJ)/k_{cat}(wt)]$ ; f: synergistic stimulation by DnaJ+substrate; -, not detectable; +, proficient; numbers=  $[k_{cat}(mut+DnaJ+substrate)/k_{cat}(mut)]/[k_{cat}(wt+DnaJ+substrate)/k_{cat}(wt)]$ ; g: ATP-stimulated substrate release; -, not detectable; +, proficient; numbers=  $[k_{off}(mut+ATP)/k_{off}(mut)]/[k_{off}(wt+ATP)/k_{off}(wt)]$ ; h: ATP-induced conformational changes as determined by proteolysis, tryptophane fluorescence (blueshift), or small angle X-ray scattering (SAXS); red., reduced; wt, wild type-like;  $\Delta Rg$ , change in radius of gyration.

## References

1. Wei J, Gaut JR, Hendershot LM. In vitro dissociation of BiP-peptide complexes requires a conformational change in BiP after ATP binding but does not require ATP hydrolysis. *J Biol Chem.* 1995 Nov 3;270(44):26677–82.
2. Sousa MC, McKay DB. The hydroxyl of threonine 13 of the bovine 70-kDa heat shock cognate protein is essential for transducing the ATP-induced conformational change. *Biochemistry.* 1998 Nov 3;37(44):15392–9.
3. Johnson ER, McKay DB. Mapping the role of active site residues for transducing an ATP-induced conformational change in the bovine 70-kDa heat shock cognate protein. *Biochemistry.* 1999 Aug 17;38(33):10823–30.
4. Barthel TK, Zhang J, Walker GC. ATPase-defective derivatives of *Escherichia coli* DnaK that behave differently with respect to ATP-induced conformational change and peptide release. *Journal of Bacteriology.* 2001 Oct 1;183(19):5482–90.
5. Burkholder WF, Panagiotidis CA, Silverstein SJ, Cegielska A, Gottesman ME, Gaitanaris GA. Isolation and characterization of an *Escherichia coli* DnaK mutant with impaired ATPase activity. *Journal of Molecular Biology.* 1994 Sep 30;242(4):364–77.
6. Vogel M, Bukau B, Mayer MP. Allosteric regulation of Hsp70 chaperones by a proline switch. *Molecular Cell.* 2006 Feb 3;21(3):359–67.

7. Gässler CS, Buchberger A, Laufen T, Mayer MP, Schröder H, Valencia A, et al. Mutations in the DnaK chaperone affecting interaction with the DnaJ cochaperone. *Proc Natl Acad Sci USA*. 1998 Dec 22;95(26):15229–34.
8. Kityk R, Vogel M, Schlecht R, Bukau B, Mayer MP. Pathways of allosteric regulation in Hsp70 chaperones. *Nat Commun*. 2015;6:8308.
9. Vogel M, Mayer MP, Bukau B. Allosteric regulation of Hsp70 chaperones involves a conserved interdomain linker. *J Biol Chem*. 2006 Dec 15;281(50):38705–11.
10. Suh WC, Burkholder WF, Lu CZ, Zhao X, Gottesman ME, Gross CA. Interaction of the Hsp70 molecular chaperone, DnaK, with its cochaperone DnaJ. *Proc Natl Acad Sci USA*. 1998 Dec 22;95(26):15223–8.
11. O'Brien MC, McKay DB. Threonine 204 of the chaperone protein Hsc70 influences the structure of the active site, but is not essential for ATP hydrolysis. *J Biol Chem*. 1993 Nov 15;268(32):24323–9.
12. Kamath-Loeb AS, Lu CZ, Suh WC, Lonetto MA, Gross CA. Analysis of three DnaK mutant proteins suggests that progression through the ATPase cycle requires conformational changes. *J Biol Chem*. 1995 Dec 15;270(50):30051–9.
13. Smock RG, Rivoire O, Russ WP, Swain JF, Leibler S, Ranganathan R, et al. An interdomain sector mediating allostery in Hsp70 molecular chaperones. *Mol Syst Biol*. 2010 Sep 21;6:414.
14. Laufen T, Mayer MP, Beisel C, Klostermeier D, Mogk A, Reinstein J, et al. Mechanism of regulation of hsp70 chaperones by DnaJ cochaperones. *Proc Natl Acad Sci USA*. 1999 May 11;96(10):5452–7.
15. Mayer MP, Laufen T, Paal K, McCarty JS, Bukau B. Investigation of the interaction between DnaK and DnaJ by surface plasmon resonance spectroscopy. *Journal of Molecular Biology*. 1999 Jun 18;289(4):1131–44.
16. Kumar DP, Vorvis C, Sarbeng EB, Cabra Ledesma VC, Willis JE, Liu Q. The four hydrophobic residues on the Hsp70 inter-domain linker have two distinct roles. *Journal of Molecular Biology*. 2011 Sep 2;411(5):1099–113.
17. Montgomery DL, Morimoto RI, Gierasch LM. Mutations in the substrate binding domain of the Escherichia coli 70 kDa molecular chaperone, DnaK, which alter substrate affinity or interdomain coupling. *Journal of Molecular Biology*. 1999 Feb 26;286(3):915–32.
